# Supplementary material
Source: Springer Nature journal article supplement (https://www.springermedizin.de/resource/supplementary/12967_2010_741_MOESM7_ESM.pdf/9577422)

**Figure 5**

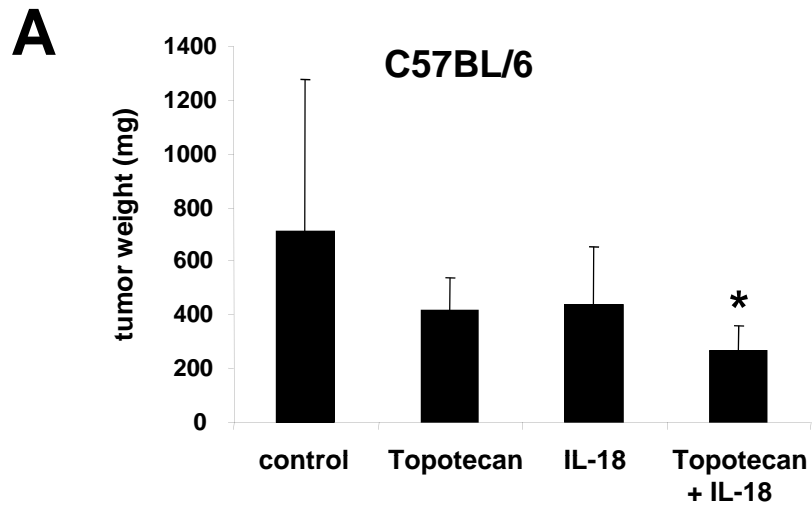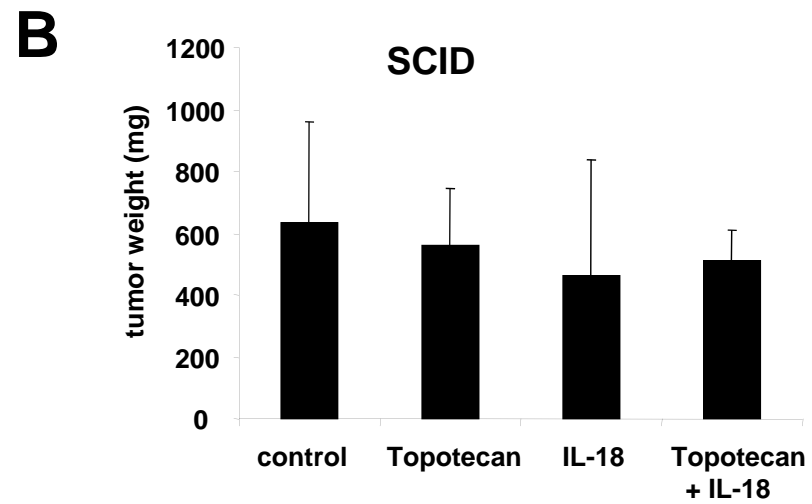

Supplement: MOESM7 [file 9577422]
